# Supplementary material for: A self-assembled coordination cage enhances the reactivity of confined amides via mechanical bond-twisting
Source: Royal Society of Chemistry journal article supplement (doi:10.1039/d2cp03126d), 2022-01-01
Supplement: d2cp03126d2.pdf [file d2cp03126d2.pdf]

**Supplementary Information for  
Self-Assembled Coordination Cage Enhances Reactivity of Confined  
Amides via Mechanical Bond-Twisting**

Hiroyuki Tamura\*<sup>1,2</sup>, Hiroki Takezawa<sup>1,3</sup>, Makoto Fujita<sup>1,3,4</sup>, Hiroshi Ishikita\*<sup>1,2</sup>

- 1) Department of Applied Chemistry, The University of Tokyo, 7-3-1 Hongo, Bunkyo-ku, Tokyo 113-8654, Japan
- 2) Research Center for Advanced Science and Technology, The University of Tokyo, 4-6-1 Komaba, Meguro-ku, Tokyo 153-8904, Japan
- 3) Mitsui Link Lab Kashiwanoha 1, FS CREATION, 6-6-2 Kashiwanoha, Kashiwa, Chiba 227-0882, Japan
- 4) Division of Advanced Molecular Science, Institute for Molecular Science (IMS), 5-1 Higashiyama, Myodaiji, Okazaki, Aichi 444-8787, Japan

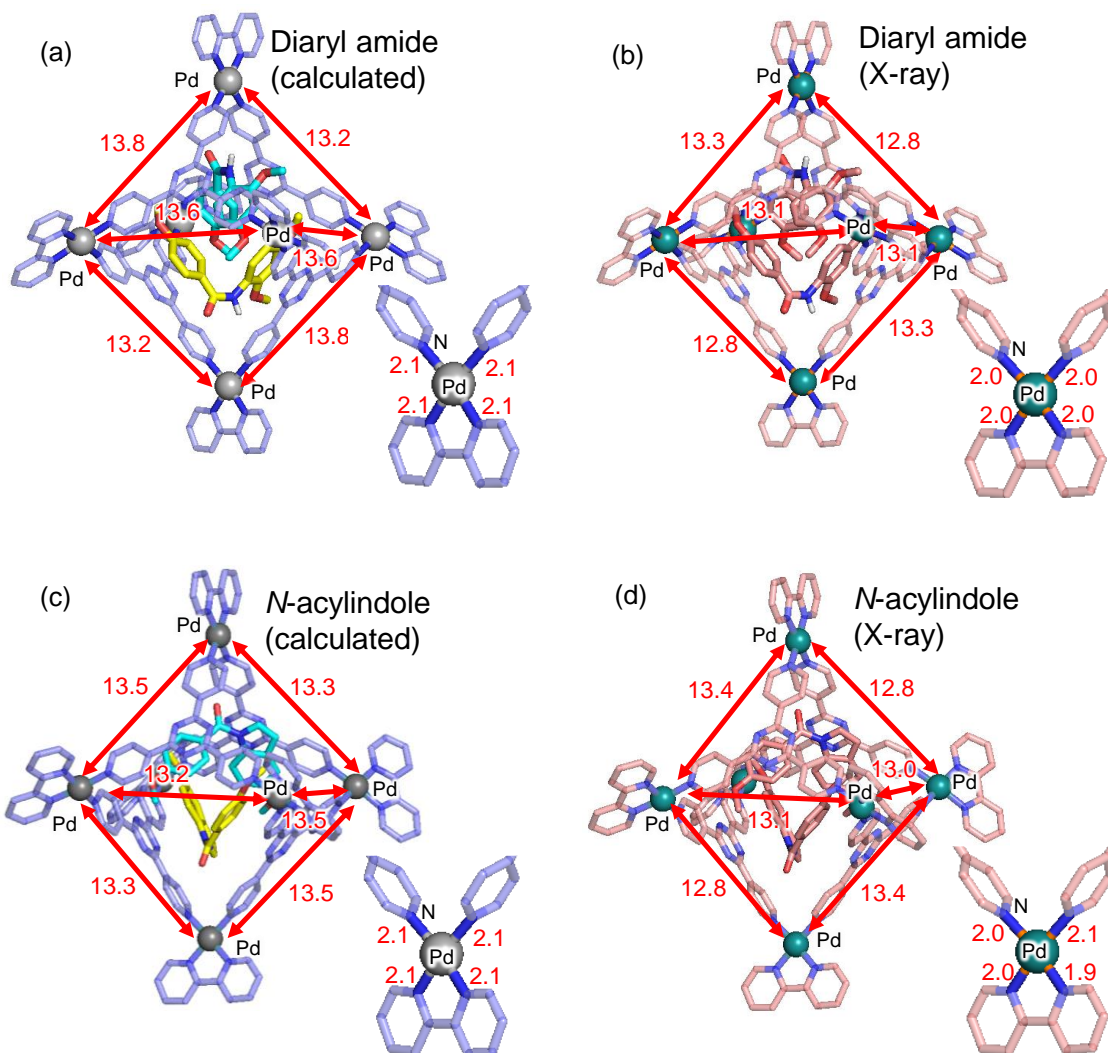

Fig. S1. Pd-Pd and Pd-N distances ( $\text{\AA}$ ) in the octahedral coordination cage which encapsulates (a)(b) two diaryl amides and (c)(d) two *N*-acylindole (a)(c) as calculated by DFT-(B3LYP-D3)-QM/MM/PCM and (b)(d) as determined by X-ray diffraction.

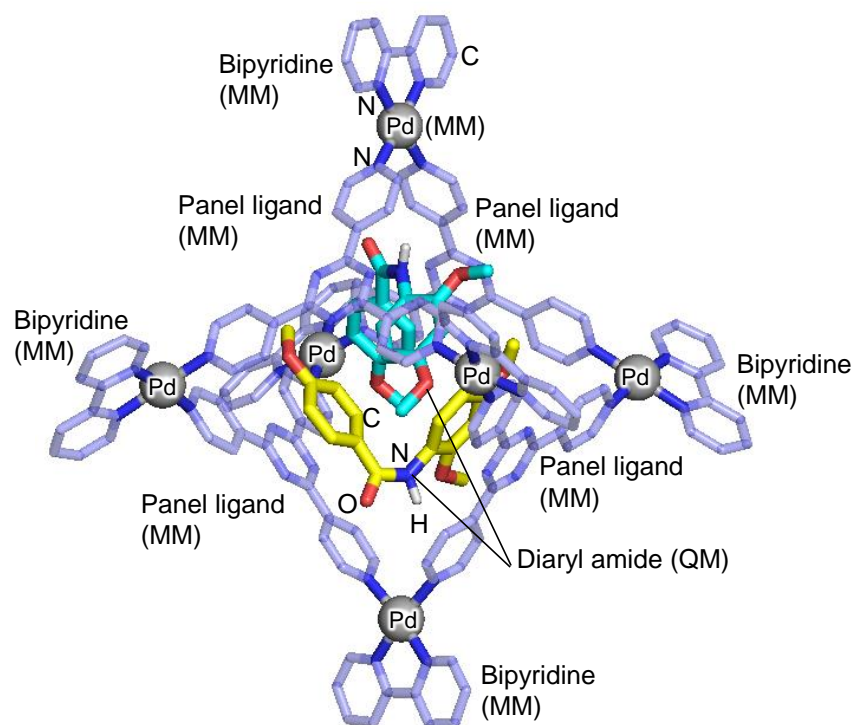

Fig. S2. QM and MM regions of the amide-confined cage. The amide molecules are included in the QM regions. The panel ligands, bipyridine, and Pd are included in the MM region.
